# Supplementary material for: Meta-analysis Reveals Genome-Wide Significance at 15q13 for Nonsyndromic Clefting of Both the Lip and the Palate, and Functional Analyses Implicate GREM1 As a Plausible Causative Gene
Source: PubMed Central journal article supplement (PMC4788144; doi:10.1371/journal.pgen.1005914), 2016-03-11
Supplement: pgen.1005914.s007.pdf [file pgen.1005914.s007.pdf]

## S1 Table: Association results and *in silico* annotation

(A) for all variants with  $P < 10^{-04}$  in imputation analysis of the nsCLP subphenotype

| SNP              | Chr. | Pos (hg19) | RA | RA freq. (%) | P-value         | RR   | lower RR | upper RR | info-score | cis-effect on <i>GREM1</i> in blood * | D' to rs2600520 in CEU | HaploReg motifchange by Ward and Kellis, 2012, Nuc Acid Res                                                                              |
|------------------|------|------------|----|--------------|-----------------|------|----------|----------|------------|---------------------------------------|------------------------|------------------------------------------------------------------------------------------------------------------------------------------|
| rs2600520        | 15   | 33054519   | G  | 67.13        | <b>3.19E-06</b> | 1.6  | 1.31     | 1.97     | 0.98       | not reported                          | 1                      | Egr-1_disc1;Sin3Ak-20_disc5;Zfx                                                                                                          |
| rs2600519        | 15   | 33054523   | A  | 66.94        | <b>3.29E-06</b> | 1.6  | 1.31     | 1.96     | 0.99       | not reported                          | 1                      | Sin3Ak-20_disc5;Zfx                                                                                                                      |
| rs1258763        | 15   | 33050423   | T  | 66.27        | <b>4.25E-06</b> | 1.58 | 1.29     | 1.93     | 1.00       | not reported                          | 1                      | Cdx2_1;GR_known2;Hoxb13                                                                                                                  |
| rs1258757        | 15   | 33051684   | C  | 66.38        | <b>4.39E-06</b> | 1.58 | 1.29     | 1.93     | 1.00       | not reported                          | 1                      | Pbx-1_4;RREB-1_1;TCF4_known1                                                                                                             |
| rs1258756        | 15   | 33051810   | G  | 66.38        | <b>4.41E-06</b> | 1.58 | 1.29     | 1.93     | 1.00       | not reported                          | 1                      | Mef2_disc1;Mef2_known2;Mef2_known3;Mef2_known6                                                                                           |
| rs1258762        | 15   | 33050657   | T  | 66.37        | <b>4.47E-06</b> | 1.58 | 1.29     | 1.93     | 1.00       | not reported                          | 1                      | HDAC2_disc6;Pax-4_4;Sox_5;TATA_disc7;ZEB1_known2;p300_disc5                                                                              |
| rs1258758        | 15   | 33051606   | A  | 66.76        | <b>7.03E-06</b> | 1.57 | 1.28     | 1.92     | 0.99       | not reported                          | 1                      | ATF3_known6;Osr                                                                                                                          |
| rs3930082        | 15   | 33063527   | C  | 44.45        | <b>1.50E-05</b> | 1.48 | 1.24     | 1.77     | 0.96       | not reported                          | n.a.                   | AP-1_disc10;BCL_disc10;BCL_disc8;Egr-1_disc1;Egr-1_known1;Egr-1_known2;Egr-1_known3;Egr-1_known5;MOVO-B;Nrf1_disc3;PLAG1;Sp4;TCF12_disc3 |
| rs9635315        | 15   | 33044871   | G  | 70.44        | <b>1.67E-05</b> | 1.57 | 1.27     | 1.95     | 0.99       | not reported                          | 1                      | Mef2_known5;RXRA_known5                                                                                                                  |
| chr15:32993757:I | 15   | 32993757   | GC | 6.94         | <b>1.75E-05</b> | 2.3  | 1.59     | 3.33     | 0.60       | not reported                          | n.a.                   | n.a.                                                                                                                                     |
| rs7179954        | 15   | 33054914   | A  | 20.48        | <b>1.75E-05</b> | 1.56 | 1.28     | 1.91     | 0.98       | not reported                          | n.a.                   | Evi-1_2                                                                                                                                  |
| chr15:32993756:I | 15   | 32993756   | CC | 6.9          | <b>1.83E-05</b> | 2.3  | 1.59     | 3.32     | 0.60       | not reported                          | n.a.                   | n.a.                                                                                                                                     |
| rs17816327       | 15   | 33056943   | G  | 16.7         | <b>2.09E-05</b> | 1.58 | 1.28     | 1.94     | 1.00       | not reported                          | 1                      | CEBPB_known6;p300_disc2                                                                                                                  |
| rs11857585       | 15   | 33043284   | T  | 70.33        | <b>2.10E-05</b> | 1.56 | 1.26     | 1.93     | 1.00       | not reported                          | 1                      | Ets_known8;Foxa_disc5;NERF1a;YY1_known5                                                                                                  |
| chr15:33071480:D | 15   | 33071480   | G  | 16.63        | <b>2.12E-05</b> | 1.59 | 1.29     | 1.96     | 0.98       | not reported                          | n.a.                   | n.a.                                                                                                                                     |
| rs7166046        | 15   | 33043835   | C  | 70.33        | <b>2.14E-05</b> | 1.56 | 1.26     | 1.93     | 1.00       | not reported                          | 1                      | EWSR1-FLI1;Elf3;Foxa_known4;GATA_disc3;HDAC2_disc6;Nanog_disc2;TATA_disc7                                                                |

|            |    |          |   |       |                 |      |      |      |      |              |       |                                                                                                                                                                                                                                                                                                                                     |
|------------|----|----------|---|-------|-----------------|------|------|------|------|--------------|-------|-------------------------------------------------------------------------------------------------------------------------------------------------------------------------------------------------------------------------------------------------------------------------------------------------------------------------------------|
| rs11854905 | 15 | 33048409 | A | 70.35 | <b>2.21E-05</b> | 1.56 | 1.26 | 1.93 | 1.00 | not reported | 1     | AP-1_disc10;CCNT2_disc2;CHD2_disc3;CTCF_disc5;E2F_disc3;E2F_disc7;Ets_disc9;GR_disc6;Irf_disc4;Irf_disc5;MZF1::1-4_1;MZF1::1-4_2;Myc_disc10;Myf_1;Nrf1_disc3;PU.1_disc3;Pax-4_5;Pax-5_known1;Pou2f2_disc2;Rad21_disc10;Rad21_disc7;SMC3_disc3;SP1_disc3;SP1_known1;SP1_known2;SP1_known4;STAT_disc7;Sp4;TATA_disc4;YY1_disc3;Zfp281 |
| rs1979170  | 15 | 33063372 | T | 44.1  | <b>2.35E-05</b> | 1.46 | 1.22 | 1.75 | 0.97 | not reported | n.a.  | BDP1_disc1;CTCF_disc8;Ets_disc7;Irf_disc4;Irf_disc5;Myf_1;NRSF_disc5;RXRA_disc2;RXRA_known3;Rad21_disc1;Rad21_disc7;SMC3_disc1;SP1_disc3;Znf143_disc4                                                                                                                                                                               |
| rs17816321 | 15 | 33053948 | C | 16.22 | <b>2.56E-05</b> | 1.59 | 1.29 | 1.96 | 0.98 | not reported | 1     | BCL_disc4;Irf_disc3;Irf_known9;PU.1_disc2;Pax-5_disc3;RXRA_disc4;STAT_disc3;p300_disc5                                                                                                                                                                                                                                              |
| rs2600527  | 15 | 33053500 | T | 64.26 | <b>2.61E-05</b> | 1.51 | 1.24 | 1.84 | 0.98 | not reported | 1     | PPAR_2;SP1_known4                                                                                                                                                                                                                                                                                                                   |
| rs2697936  | 15 | 33053402 | G | 64.25 | <b>2.62E-05</b> | 1.51 | 1.24 | 1.84 | 0.98 | not reported | 1     | .                                                                                                                                                                                                                                                                                                                                   |
| rs2840190  | 15 | 33060407 | A | 16.77 | <b>2.79E-05</b> | 1.57 | 1.27 | 1.93 | 1.00 | 0.003448992  | 0.856 | Rad21_disc9                                                                                                                                                                                                                                                                                                                         |
| rs16958561 | 15 | 33060040 | C | 16.77 | <b>2.82E-05</b> | 1.57 | 1.27 | 1.93 | 1.00 | 0.002830226  | 1     | HDAC2_disc5;PRDM1_disc1;PRDM1_known1                                                                                                                                                                                                                                                                                                |
| rs28425489 | 15 | 33064556 | A | 43.05 | <b>2.91E-05</b> | 1.45 | 1.22 | 1.73 | 0.99 | not reported | 1     | NF-I_1                                                                                                                                                                                                                                                                                                                              |
| rs10519742 | 15 | 33061723 | G | 16.8  | <b>2.96E-05</b> | 1.57 | 1.27 | 1.92 | 1.00 | not reported | 1     | Hoxa5_1;Pou2f2_known3;Pou3f2_2                                                                                                                                                                                                                                                                                                      |
| rs34362234 | 15 | 33053599 | T | 64.34 | <b>3.04E-05</b> | 1.51 | 1.24 | 1.84 | 0.97 | not reported | 1     | Irf_known10;Osr                                                                                                                                                                                                                                                                                                                     |
| rs75144062 | 15 | 33062886 | T | 16.82 | <b>3.04E-05</b> | 1.56 | 1.27 | 1.92 | 1.00 | not reported | 1     | .                                                                                                                                                                                                                                                                                                                                   |
| rs11630940 | 15 | 33067592 | A | 16.85 | <b>3.15E-05</b> | 1.56 | 1.27 | 1.92 | 0.99 | not reported | 1     | ATF3_known4;Cdx2_2;FXR_3;Hoxc10;Hoxc9;Pax-2_2                                                                                                                                                                                                                                                                                       |
| rs11633236 | 15 | 33047856 | G | 15.82 | <b>3.32E-05</b> | 1.58 | 1.28 | 1.96 | 0.99 | not reported | 1     | CEBPB_known6;CEBPG;Hdx;STAT_disc4                                                                                                                                                                                                                                                                                                   |
| rs28696324 | 15 | 33064654 | C | 42.96 | <b>3.53E-05</b> | 1.44 | 1.21 | 1.72 | 0.99 | not reported | 1     | Cart1;HMG-IY_2;HNF1_7;Hoxd8;Ncx_2;Nkx2_11;STAT_known3;Zfp105                                                                                                                                                                                                                                                                        |
| rs28403314 | 15 | 33064636 | A | 44.73 | <b>3.56E-05</b> | 1.46 | 1.22 | 1.74 | 0.94 | not reported | 1     | .                                                                                                                                                                                                                                                                                                                                   |
| rs28756786 | 15 | 33064574 | A | 42.98 | <b>3.58E-05</b> | 1.44 | 1.21 | 1.72 | 0.99 | not reported | 1     | Gfi1b;Hoxa10;Maf_disc2;Maf_known3;Maf_known4                                                                                                                                                                                                                                                                                        |
| rs28379322 | 15 | 33064577 | A | 42.98 | <b>3.58E-05</b> | 1.44 | 1.21 | 1.72 | 0.99 | not reported | 0.93  | Hoxa10                                                                                                                                                                                                                                                                                                                              |
| rs13329310 | 15 | 33052553 | T | 75.59 | <b>3.74E-05</b> | 1.61 | 1.28 | 2.04 | 0.92 | not reported | n.a.  | Mef2_known5                                                                                                                                                                                                                                                                                                                         |

|                  |    |          |    |       |                 |      |      |      |      |              |       |                                                                                                                    |
|------------------|----|----------|----|-------|-----------------|------|------|------|------|--------------|-------|--------------------------------------------------------------------------------------------------------------------|
| rs12050761       | 15 | 33063603 | C  | 43.16 | <b>4.33E-05</b> | 1.44 | 1.21 | 1.71 | 1.00 | not reported | 1     | .                                                                                                                  |
| rs3743106        | 15 | 33063809 | T  | 43.06 | <b>4.47E-05</b> | 1.43 | 1.21 | 1.71 | 0.99 | not reported | 1     | Smad_2                                                                                                             |
| rs3825862        | 15 | 33064148 | T  | 43.2  | <b>4.57E-05</b> | 1.43 | 1.2  | 1.71 | 1.00 | not reported | 1     | ATF4;Bach2;p300_disc7                                                                                              |
| rs2600525        | 15 | 33053603 | T  | 64.72 | <b>4.58E-05</b> | 1.5  | 1.23 | 1.82 | 0.97 | not reported | 1     | Foxc1_1;Foxj2_1;Osr                                                                                                |
| rs11638456       | 15 | 33049662 | G  | 16    | <b>4.62E-05</b> | 1.57 | 1.27 | 1.94 | 0.99 | not reported | n.a.  | .                                                                                                                  |
| rs2600524        | 15 | 33053641 | A  | 64.76 | <b>4.87E-05</b> | 1.49 | 1.23 | 1.82 | 0.97 | not reported | 1     | Nrf1_known2;Pdx1_2;Pou3f2_3                                                                                        |
| rs2600526        | 15 | 33053594 | C  | 64.76 | <b>4.89E-05</b> | 1.49 | 1.23 | 1.82 | 0.97 | not reported | 1     | Osr                                                                                                                |
| rs28728267       | 15 | 33064474 | G  | 43.23 | <b>4.89E-05</b> | 1.43 | 1.2  | 1.7  | 1.00 | not reported | 1     | .                                                                                                                  |
| rs12915645       | 15 | 33045226 | T  | 15.97 | <b>5.21E-05</b> | 1.56 | 1.26 | 1.93 | 0.99 | not reported | 1     | GATA_known13;PLZF;Pou3f2_3;SRF_known3;SRF_known6                                                                   |
| rs12904470       | 15 | 33042833 | G  | 15.96 | <b>5.61E-05</b> | 1.56 | 1.26 | 1.93 | 0.99 | not reported | 1     | Ascl2;DMRT1;E2A_2;E2A_5;HEN1_1;HEN1_2;Lmo2-complex_1;NRSF_disc1;NRSF_disc5;NRSF_known3;Pbx3_known1;Sin3Ak-20_disc1 |
| rs28399071       | 15 | 32992658 | G  | 88.95 | <b>6.05E-05</b> | 1.97 | 1.38 | 2.81 | 0.97 | not reported | 0.383 | n.a.                                                                                                               |
| rs28414020       | 15 | 33064461 | C  | 43.46 | <b>6.07E-05</b> | 1.43 | 1.2  | 1.7  | 0.99 | not reported | 0.93  | Foxo_3;Mef2_known2;Mef2_known5;TCF12_disc2                                                                         |
| rs28630996       | 15 | 32993860 | A  | 88.84 | <b>6.37E-05</b> | 1.95 | 1.37 | 2.77 | 0.98 | not reported | 0.599 | n.a.                                                                                                               |
| rs16969681       | 15 | 32993111 | C  | 90.14 | <b>6.84E-05</b> | 2.05 | 1.4  | 2.99 | 0.98 | not reported | 0.493 | n.a.                                                                                                               |
| rs76173415       | 15 | 33032639 | T  | 15.66 | <b>7.17E-05</b> | 1.56 | 1.26 | 1.93 | 0.99 | not reported | 0.827 | GR_known2                                                                                                          |
| chr15:32993754:l | 15 | 32993754 | TG | 7.38  | <b>8.00E-05</b> | 2.12 | 1.47 | 3.04 | 0.61 | not reported | n.a.  | n.a.                                                                                                               |
| rs16958734       | 15 | 33067145 | C  | 17.3  | <b>8.08E-05</b> | 1.52 | 1.24 | 1.87 | 1.00 | 0.003426893  | 1     | ATF3_known8;BDP1_disc1;Pou1f1_2                                                                                    |
| rs72717674       | 15 | 33126395 | G  | 9.88  | <b>8.28E-05</b> | 1.81 | 1.36 | 2.41 | 0.76 | not reported | 0.66  | n.a.                                                                                                               |

Chr. - chromosome, Pos - position, RA - risk allele, RA freq - frequency of the risk allele in percent in controls, RR - relative risk, CEU - Central European population. \* Data drawn from Westra et al., 2013 [37]

**(B) 38 SNPs with eQTL effect**

| SNP        | Chr. | Pos (hg19) | RA | RA freq. (%) | P-value  | RR   | lower RR | upper RR | info-score | cis-effect on <i>GREM1</i> in blood* | D' to rs2600520 in CEU |
|------------|------|------------|----|--------------|----------|------|----------|----------|------------|--------------------------------------|------------------------|
| rs17816375 | 15   | 33080747   | C  | 28.43        | 3.29E-02 | 1.23 | 1.02     | 1.48     | 0.95       | 1.64E-05                             | 0.21                   |
| rs11632517 | 15   | 33081949   | C  | 28.42        | 3.16E-02 | 1.23 | 1.02     | 1.48     | 0.95       | 1.94E-05                             | 0.21                   |
| rs11631485 | 15   | 33076037   | C  | 28.56        | 3.45E-02 | 1.22 | 1.02     | 1.48     | 0.96       | 2.85E-05                             | 0.10                   |
| rs16958843 | 15   | 33075645   | C  | 28.52        | 3.45E-02 | 1.22 | 1.02     | 1.48     | 0.96       | 2.89E-05                             | 0.10                   |
| rs1258790  | 15   | 33110065   | T  | 46.37        | 2.15E-01 | 1.12 | 0.94     | 1.32     | 0.99       | 9.16E-05                             | 0.02                   |
| rs896505   | 15   | 33126392   | C  | 36.49        | 2.50E-01 | 1.11 | 0.93     | 1.33     | 0.97       | 9.75E-05                             | 0.20                   |
| rs17228873 | 15   | 33145511   | T  | 22.07        | 7.29E-01 | 1.04 | 0.84     | 1.28     | 0.99       | 1.47E-04                             | 0.03                   |
| rs1258734  | 15   | 33067656   | G  | 31.98        | 6.15E-02 | 1.19 | 0.99     | 1.42     | 1.00       | 1.48E-04                             | 0.18                   |
| rs17228850 | 15   | 33138088   | A  | 22.02        | 7.18E-01 | 1.04 | 0.84     | 1.28     | 0.98       | 1.62E-04                             | 0.09                   |
| rs10519756 | 15   | 33148207   | T  | 22.12        | 7.27E-01 | 1.04 | 0.84     | 1.28     | 1.00       | 1.68E-04                             | 0.09                   |
| rs1258797  | 15   | 33106411   | C  | 27.09        | 2.96E-01 | 1.11 | 0.92     | 1.33     | 0.99       | 1.71E-04                             | 0.56                   |
| rs1534596  | 15   | 33114882   | C  | 36.76        | 3.06E-01 | 1.1  | 0.92     | 1.31     | 0.96       | 3.05E-04                             | 0.25                   |
| rs4780052  | 15   | 33154851   | C  | 50.11        | 5.26E-02 | 1.19 | 1        | 1.42     | 1.00       | 4.69E-04                             | 0.01                   |
| rs1258766  | 15   | 33129571   | G  | 48.68        | 2.86E-01 | 1.1  | 0.92     | 1.3      | 0.99       | 7.67E-04                             | 0.02                   |
| rs4780042  | 15   | 33129380   | C  | 25.11        | 2.10E-01 | 1.13 | 0.93     | 1.36     | 1.00       | 8.20E-04                             | 0.39                   |
| rs1258769  | 15   | 33123153   | A  | 48.22        | 2.28E-01 | 1.11 | 0.94     | 1.32     | 0.97       | 9.76E-04                             | 0.08                   |
| rs8035260  | 15   | 33158164   | C  | 43.17        | 3.23E-02 | 1.21 | 1.02     | 1.45     | 0.97       | 1.11E-03                             | 0.04                   |
| rs1258770  | 15   | 33118446   | C  | 48.4         | 2.58E-01 | 1.1  | 0.93     | 1.31     | 0.99       | 1.33E-03                             | 0.03                   |
| rs17816465 | 15   | 33156386   | A  | 20           | 8.22E-01 | 1.03 | 0.82     | 1.28     | 0.92       | 1.58E-03                             | 0.08                   |
| rs1020561  | 15   | 33060601   | A  | 20.49        | 9.40E-04 | 1.41 | 1.15     | 1.72     | 1.00       | 1.65E-03                             | 0.53                   |
| rs6494699  | 15   | 33101626   | T  | 19.15        | 2.65E-02 | 1.28 | 1.03     | 1.6      | 0.90       | 2.20E-03                             | 0.60                   |
| rs1258724  | 15   | 33061195   | C  | 25.86        | 3.22E-01 | 1.1  | 0.91     | 1.34     | 1.00       | 2.21E-03                             | 1.00                   |
| rs1258771  | 15   | 33116348   | G  | 47.83        | 2.31E-01 | 1.11 | 0.93     | 1.32     | 0.98       | 2.47E-03                             | 0.03                   |
| rs17816423 | 15   | 33121278   | G  | 36.31        | 4.87E-01 | 1.07 | 0.89     | 1.28     | 0.97       | 2.47E-03                             | 0.37                   |
| rs12101843 | 15   | 33124275   | C  | 38.3         | 3.68E-01 | 1.09 | 0.91     | 1.3      | 0.98       | 2.61E-03                             | 0.37                   |

|            |    |          |   |       |          |      |      |      |      |          |      |
|------------|----|----------|---|-------|----------|------|------|------|------|----------|------|
| rs16958561 | 15 | 33060040 | C | 16.77 | 2.82E-05 | 1.57 | 1.27 | 1.93 | 1.00 | 2.83E-03 | 1.00 |
| rs7178265  | 15 | 33105403 | G | 25    | 1.19E-01 | 1.16 | 0.96 | 1.4  | 1.00 | 3.09E-03 | 0.47 |
| rs1258725  | 15 | 33061759 | A | 20.59 | 1.16E-03 | 1.4  | 1.14 | 1.7  | 1.00 | 3.20E-03 | 0.51 |
| rs3110558  | 15 | 33062339 | A | 20.59 | 1.16E-03 | 1.4  | 1.14 | 1.7  | 1.00 | 3.20E-03 | 0.51 |
| rs1258728  | 15 | 33062103 | T | 21.17 | 1.37E-03 | 1.39 | 1.14 | 1.7  | 0.98 | 3.20E-03 | 0.51 |
| rs1258731  | 15 | 33064791 | A | 25.91 | 3.37E-01 | 1.1  | 0.91 | 1.33 | 1.00 | 3.20E-03 | 1.00 |
| rs1258721  | 15 | 33057357 | A | 25.82 | 3.12E-01 | 1.1  | 0.91 | 1.34 | 1.00 | 3.26E-03 | 1.00 |
| rs1258718  | 15 | 33078376 | C | 25.75 | 3.72E-01 | 1.09 | 0.9  | 1.33 | 0.96 | 3.27E-03 | 1.00 |
| rs1057473  | 15 | 33063930 | A | 25.91 | 3.37E-01 | 1.1  | 0.91 | 1.33 | 1.00 | 3.35E-03 | 1.00 |
| rs2600522  | 15 | 33054126 | T | 47.77 | 6.06E-01 | 1.05 | 0.88 | 1.24 | 0.98 | 3.35E-03 | 1.00 |
| rs16958734 | 15 | 33067145 | C | 17.3  | 8.08E-05 | 1.52 | 1.24 | 1.87 | 1.00 | 3.43E-03 | 1.00 |
| rs2840190  | 15 | 33060407 | A | 16.77 | 2.79E-05 | 1.57 | 1.27 | 1.93 | 1.00 | 3.45E-03 | 0.86 |
| rs1258719  | 15 | 33078951 | G | 26.2  | 4.17E-01 | 1.08 | 0.89 | 1.32 | 0.94 | 3.48E-03 | 1.00 |

Chr. - chromosome, Pos - position, RA - risk allele, RA freq - frequency of the risk allele in percent in controls, RR - relative risk, CEU - Central European population. Six SNPs highlighted in bold have been detected as eQTL with a false discovery rate below 0.05. SNPs shaded in blue indicate potential causative variants with eQTL effect, lower risk allele frequency as the rs2600520 risk allele and linkage disequilibrium  $D'=1$  compared to rs2600520. \* Data drawn from Westra et al., 2013 [37].
