# Supplementary material for: Meta-analysis Reveals Genome-Wide Significance at 15q13 for Nonsyndromic Clefting of Both the Lip and the Palate, and Functional Analyses Implicate GREM1 As a Plausible Causative Gene
Source: PubMed Central journal article supplement (PMC4788144; doi:10.1371/journal.pgen.1005914), 2016-03-11
Supplement: pgen.1005914.s008.pdf [file pgen.1005914.s008.pdf]

**S2 Table: Sizes of E13.5 palatal shelves cultured in the absence or presence of recombinant Grem1 protein.**

Arbitrary area units measured with imagej (<http://imagej.nih.gov/ij/>) are listed. Growth of palatal shelves was observed in both groups (control; N = 20, Grem1-treated; N = 12), however, neither final sizes nor the increase in size of the Grem1-treated palatal shelves differed from those calculated for the control group.

| <b>Control</b> |         |          |                                 |                 | <b>Grem1-treated</b> |         |          |                                                     |                 |
|----------------|---------|----------|---------------------------------|-----------------|----------------------|---------|----------|-----------------------------------------------------|-----------------|
| Sample         | 0 hours | 24 hours | 48 hours                        | % (48hours)     | Sample               | 0 hours | 24 hours | 48 hours                                            | % (48 hours)    |
| 1              | 39383   | 48299    | 56802                           | 144.2297        | 1                    | 29046   | 33699    | 37291                                               | 128.386         |
| 2              | 25522   | 27400    | 33545                           | 131.4356        | 2                    | 30246   | 29180    | 35459                                               | 117.2353        |
| 3              | 35017   | 32270    | 38641                           | 110.3493        | 3                    | 33876   | 32130    | 35737                                               | 105.4936        |
| 4              | 38444   | 41640    | 49537                           | 128.855         | 4                    | 31912   | 32214    | 41169                                               | 129.0079        |
| 5              | 33741   | 34218    | 40126                           | 118.9236        | 5                    | 40902   | 38121    | 46481                                               | 113.6399        |
| 6              | 28585   | 28468    | 37963                           | 132.8074        | 6                    | 28382   | 27229    | 37088                                               | 130.6744        |
| 7              | 23835   | 31008    | 41310                           | 173.3166        | 7                    | 24258   | 24458    | 32017                                               | 131.9853        |
| 8              | 29402   | 29000    | 34181                           | 116.254         | 8                    | 23336   | 25200    | 34882                                               | 149.4772        |
| 9              | 36958   | 33625    | 42328                           | 114.53          | 9                    | 29235   | 25952    | 30673                                               | 104.9188        |
| 10             | 33881   | 33709    | 44409                           | 131.0735        | 10                   | 28440   | 33898    | 39785                                               | 139.891         |
| 11             | 34576   | 39244    | 45108                           | 130.4604        | 11                   | 34633   | 28066    | 40921                                               | 118.1561        |
| 12             | 25912   | 24315    | 32254                           | 124.4751        | 12                   | 26704   | 33468    | 46114                                               | 172.6857        |
| 13             | 30512   | 28469    | 35393                           | 115.997         |                      |         |          | Average                                             | 128.4626        |
| 14             | 34073   | 30133    | 39399                           | 115.6311        |                      |         |          | <b>0 hours vs 48 hours; P =</b>                     | <b>5.86E-05</b> |
| 15             | 33278   | 31203    | 38948                           | 117.0383        |                      |         |          |                                                     |                 |
| 16             | 35007   | 38046    | 46145                           | 131.8165        |                      |         |          |                                                     |                 |
| 17             | 27265   | 24819    | 31362                           | 115.0266        |                      |         |          | <b>Size (48hours) Control vs Grem1-treated; P =</b> | <b>0.142536</b> |
| 18             | 30939   | 26836    | 32743                           | 105.8308        |                      |         |          | <b>Growth (%) Control vs Grem1-treated; P =</b>     | <b>0.269946</b> |
| 19             | 44493   | 36417    | 44952                           | 101.0316        |                      |         |          |                                                     |                 |
| 20             | 32555   | 29802    | 41742                           | 128.2199        |                      |         |          |                                                     |                 |
|                |         |          | Average                         | 124.3651        |                      |         |          |                                                     |                 |
|                |         |          | <b>0 hours vs 48 hours; P =</b> | <b>1.74E-07</b> |                      |         |          |                                                     |                 |
