# Supplementary material for: Meta-analysis Reveals Genome-Wide Significance at 15q13 for Nonsyndromic Clefting of Both the Lip and the Palate, and Functional Analyses Implicate GREM1 As a Plausible Causative Gene
Source: PubMed Central journal article supplement (PMC4788144; doi:10.1371/journal.pgen.1005914), 2016-03-11
Supplement: pgen.1005914.s009.pdf [file pgen.1005914.s009.pdf]

**S3 Table: Ectopic Grem1 protein causes differences in the morphogenesis of cultured palatal shelves.**

Areas enclosed by 10 pairs (control) and 6 pairs (Grem1-treated) of palatal shelves were measured using imagej (<http://imagej.nih.gov/ij/>) at 0 hours (A), 24 hours and 48 hours (A'), respectively. The differences between A and A' ( $\delta A$ ) were not significant in the controls but the areas increased significantly in the Grem1-treated samples ( $P = 0.00136$ ). A comparison between  $\delta A$  of controls and  $\delta A$  of Grem1-treated samples revealed a significant difference ( $P = 0.00142$ ).

| <b>Control</b> |         |          |                  | <b>Grem1-treated</b> |         |                                                                                  |                  |
|----------------|---------|----------|------------------|----------------------|---------|----------------------------------------------------------------------------------|------------------|
|                | 0 hours | 48 hours |                  |                      | 0 hours | 48 hours                                                                         |                  |
| Sample         | A       | A'       | $\delta A(A'-A)$ | Sample               | A       | A'                                                                               | $\delta A(A'-A)$ |
| 1              | 11687   | 7512     | -4175            | 1                    | 11129   | 14905                                                                            | 3776             |
| 2              | 11028   | 8967     | -2061            | 2                    | 12345   | 18431                                                                            | 6086             |
| 3              | 17320   | 15071    | -2249            | 3                    | 10996   | 21259                                                                            | 10263            |
| 4              | 14192   | 9488     | -4704            | 4                    | 23362   | 36290                                                                            | 12928            |
| 5              | 31420   | 26432    | -4988            | 5                    | 27414   | 37293                                                                            | 9879             |
| 6              | 30256   | 27533    | -2723            | 6                    | 31113   | 36136                                                                            | 5023             |
| 7              | 22689   | 24721    | 2032             |                      |         | Average                                                                          | 7992.5           |
| 8              | 25107   | 33106    | 7999             |                      |         | STDev                                                                            | 3558.22          |
| 9              | 36827   | 36921    | 94               |                      |         |                                                                                  |                  |
| 10             | 25796   | 31450    | 5654             |                      |         |                                                                                  |                  |
|                |         | Average  | -512.1           |                      |         |                                                                                  |                  |
|                |         | STDev    | 4455.03          |                      |         |                                                                                  |                  |
|                |         |          |                  |                      |         | <b>Control A vs A'; P =</b>                                                      | <b>0.36231</b>   |
|                |         |          |                  |                      |         | <b>Grem1-treated A vs A'; P =</b>                                                | <b>0.00136</b>   |
|                |         |          |                  |                      |         | <b>Control <math>\delta A</math> vs Grem1-treated <math>\delta A</math>; P =</b> | <b>0.00142</b>   |
